# Supplementary material
Source: PubMed Central journal article supplement (PMC2894810)

## Supplemental Figure legends

*Supplemental Figure 1. Purity of sorted populations of FcRL3<sup>+</sup> T<sub>reg</sub>, FcRL3<sup>-</sup> T<sub>reg</sub> and T<sub>conv</sub>*

*A.* Pre-FACS-sorted sample showing CD25 and CD127 expression on live CD3<sup>+</sup>CD4<sup>+</sup> T cells (left panel), then CD25 and FcRL3 expression on the CD25<sup>hi</sup>CD127<sup>lo</sup> cells with either anti-FcRL3 antibody or control stain. *B.* Post-FACS-sorted FcRL3<sup>+</sup> T<sub>reg</sub>, FcRL3<sup>-</sup> T<sub>reg</sub> and T<sub>conv</sub> populations showing CD25 and CD27 expression (upper panel), and CD25 and FcRL3 expression (lower panel). *C.* Unsorted samples were analyzed for FoxP3 expression, based on gates set to equivalent levels of CD25, CD127 and FcRL3 that were obtained in the sorted populations.

*Supplemental Figure 2. Variability in T<sub>reg</sub> FcRL3 expression is not associated with variability in FoxP3 expression*

FcRL3 and FoxP3 expression were analyzed by flow cytometry as in Figure 1 in 29 healthy donors. The FcRL3 MFI, FoxP3 MFI and % FcRL3<sup>+</sup> within T<sub>reg</sub> were determined, together with the frequency of T<sub>reg</sub> within total CD4<sup>+</sup> T cells, as defined by CD25<sup>hi</sup>CD127<sup>lo</sup>FoxP3<sup>+</sup>. PBMC from the same donors were screened for the -169 C/T *FCRL3* SNP genotype by a PCR allelic discrimination assay. In (*A*) and (*B*), plots show the relationship between T<sub>reg</sub> FoxP3 MFI and either T<sub>reg</sub> FcRL3 MFI (*A*) or % FcRL3<sup>+</sup> within T<sub>reg</sub> (*B*). Statistical analysis indicates that neither parameter was significantly correlated with T<sub>reg</sub> FoxP3 MFI ( $P > 0.05$ ).  $r$  indicates the Spearman's rank correlation coefficient. In (*C*) and (*D*), donors are grouped according to genotype and shown in the category scatter plots against the T<sub>reg</sub> FoxP3 MFI (*C*) or % T<sub>reg</sub> in CD4<sup>+</sup> T cells (*D*);

horizontal bars show the mean of each group. Differences between groups were not statistically significant as determined by unpaired Student's *t*-test ( $P > 0.05$ ).

*Supplemental Figure 3. FcRL3<sup>+</sup> T<sub>reg</sub> constitute a greater fraction of T<sub>reg</sub> in the thymus than in the periphery*

FcRL3 expression was analyzed by flow cytometry on fetal thymus and either mesenteric lymph node (MLN, *A*) or spleen (*B*) from paired donors. The % FcRL3<sup>+</sup> within FoxP3<sup>+</sup>CD25<sup>hi</sup> T<sub>reg</sub> was determined for each tissue and donor.

*Supplemental Figure 4. FcRL3<sup>+</sup> T<sub>reg</sub> exhibit defective blast formation in response to αCD3/CD28 activation in the presence of IL-2*

FcRL3<sup>+</sup> T<sub>reg</sub>, FcRL3<sup>-</sup> T<sub>reg</sub>, and T<sub>conv</sub> were FACS sorted from adult PBMC and cultured in the presence of R10 medium alone, IL-2, αCD3/CD28 antibodies, or a combination of αCD3/CD28 antibodies and IL-2. FSC/SSC profiles of subpopulations cultured for 5 days are shown from one representative donor.

Supplemental Figure 1

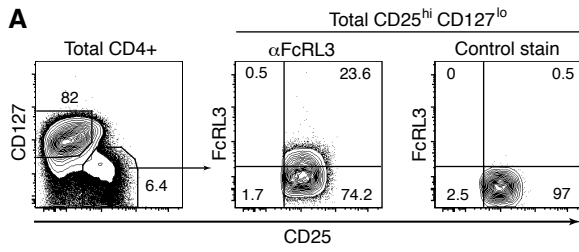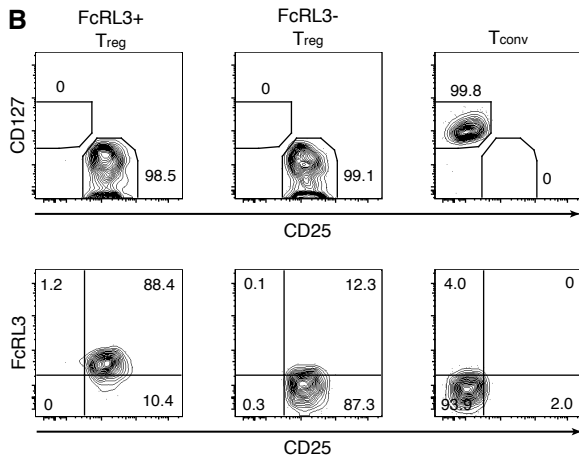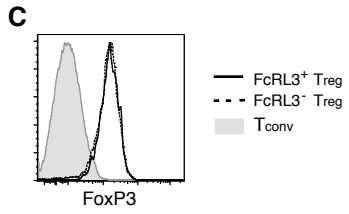

## Supplemental Figure 2

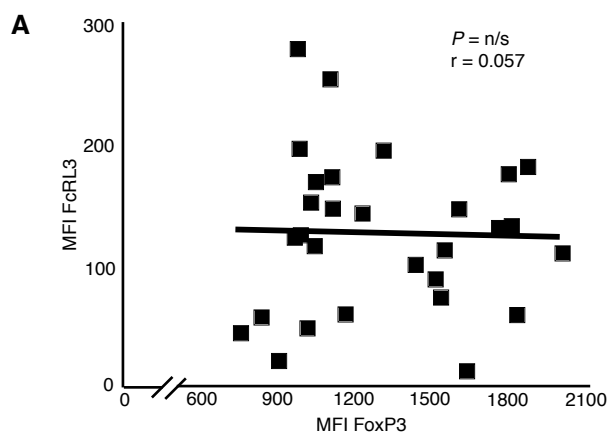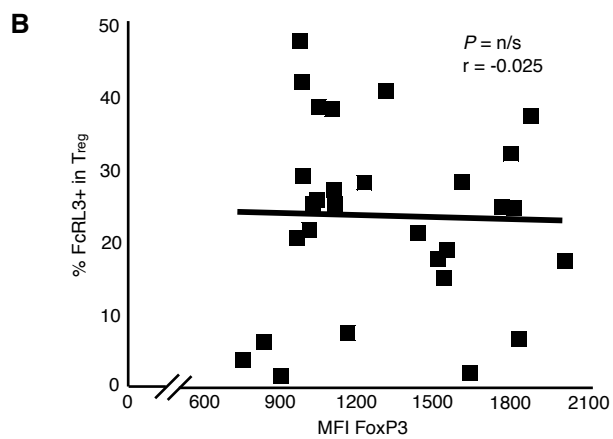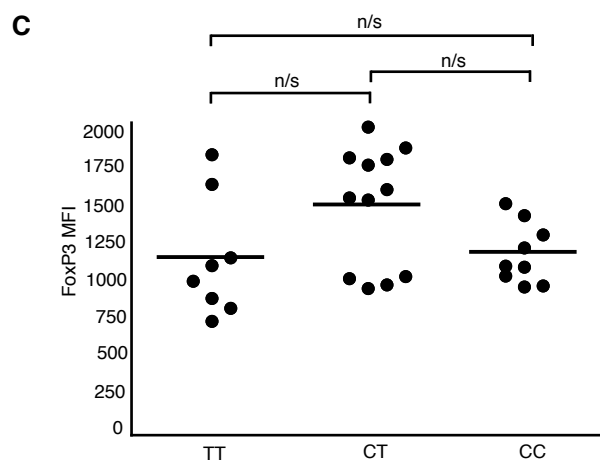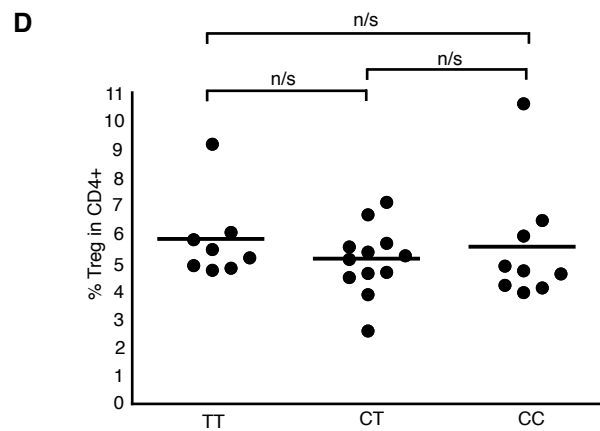

### Supplemental Figure 3

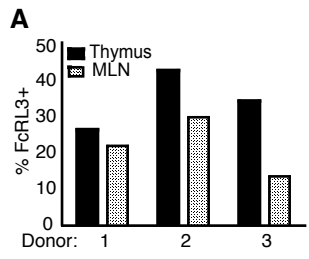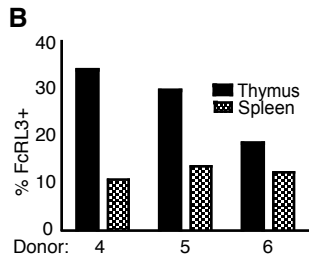

Supplemental Figure 4

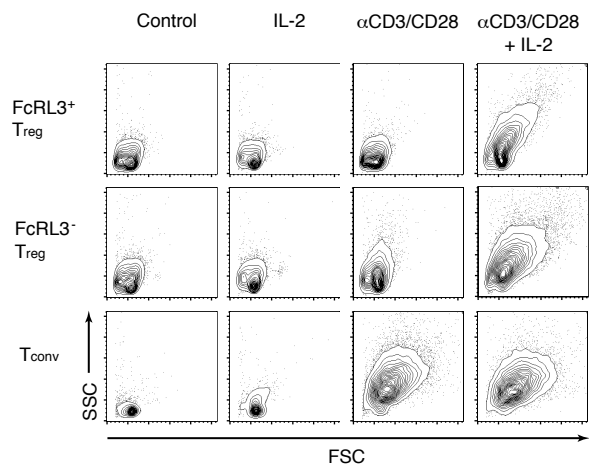

Supplement: NIHMS207784-supplement-supplement_1.pdf [file NIHMS207784-supplement-supplement_1.pdf]
